# Supplementary material for: Development of the blood–brain barrier within the paraventricular nucleus of the hypothalamus: influence of fetal glucocorticoid excess
Source: PubMed Central journal article supplement (PMC4481307; doi:10.1007/s00429-014-0787-8), 2014-05-11

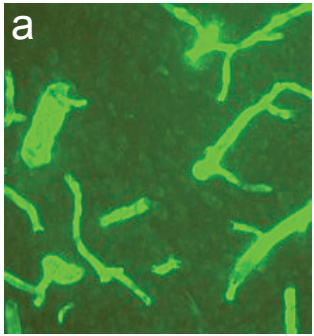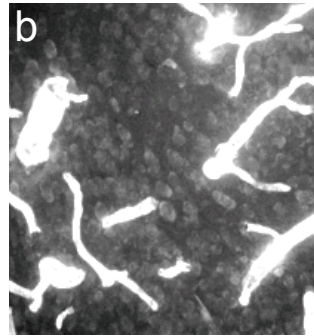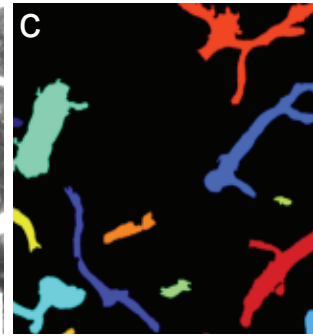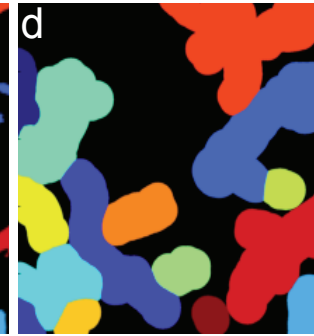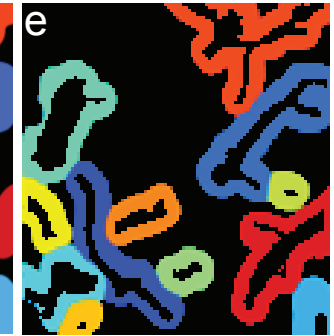

Supplement: 429_2014_787_MOESM2_ESM.pdf [file 429_2014_787_MOESM2_ESM.pdf]
